# Supplementary material
Source: publisher figshare collection journal article supplement (https://tandf.figshare.com/ndownloader/files/12832382)
Supplement: Supplementary file 1 [file 12832382]

## Supplemental material

### Interaction between the End Groups and the Main Chain of Conjugated Polymers by Time-Resolved EPR and Fluorescence Spectroscopy

Motoko S. Asano,\* Sho Hashimoto, Takuya Shinozuka, Yasutaka Fushimi and  
Kotohiro Nomura\*

*Division of Molecular Science, Graduate School of Science and Technology, Gunma University,  
1-5-1, Ten-jincho, Kiryu, Gunma 376-8515, Japan*

*Department of Chemistry, Graduate School of Science, Tokyo Metropolitan University, 1-1  
Minami-Osawa, Hachi-Ohji, Tokyo 192-0397, Japan*

Figure S1. Absorption and emission spectra in 2mTHF

Figure S2. Excitation spectra in 2mTHF

Figure S3. Fluorescence spectra in 2mTHF at 77K

Figure S4. Time-resolved fluorescence signals in THF in linear scales

Table S1. Parameters for the fits of fluorescence signal decays

Figure S5. Comparison of time-resolved fluorescence spectra

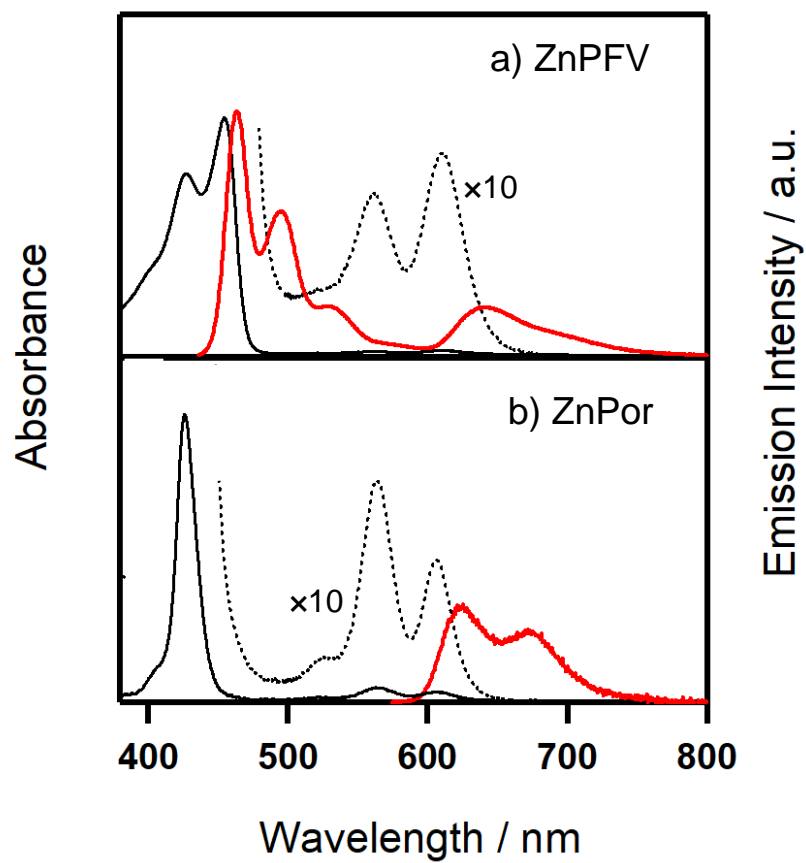

**Figure S1.** Absorption and emission spectra of ZnPFV and ZnPor in 2mTHF. Black solid lines stand for absorption spectra and dashed lines are expanded absorption spectra. Red lines are for fluorescence spectra.

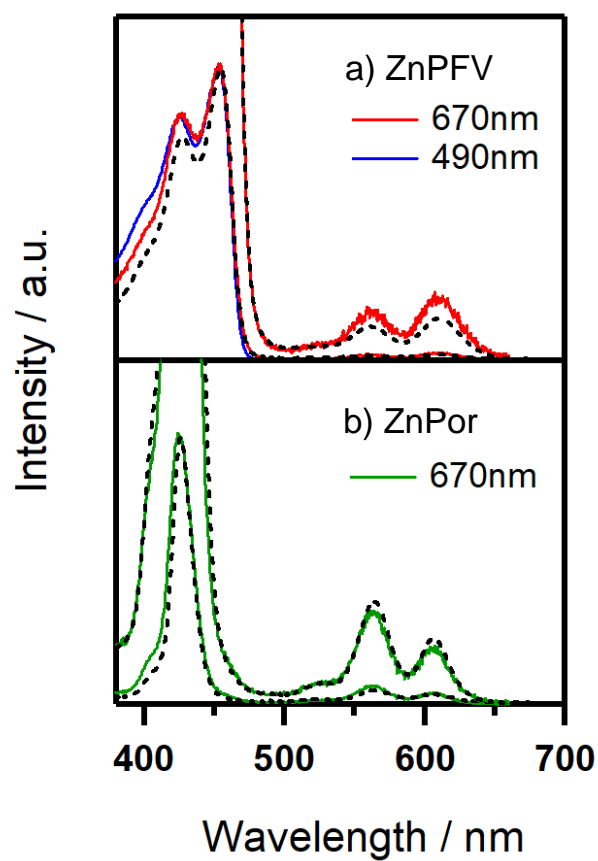

**Figure S2.** Excitation spectra in 2mTHF of a) ZnPFV monitored at 670 nm and 490nm, b) ZnPor monitored at 670 nm. Solid lines are excitation spectra whereas dashed lines are absorption spectra. The ordinate of excitation spectrum was normalized to fit the absorption spectrum in each wavelength region.

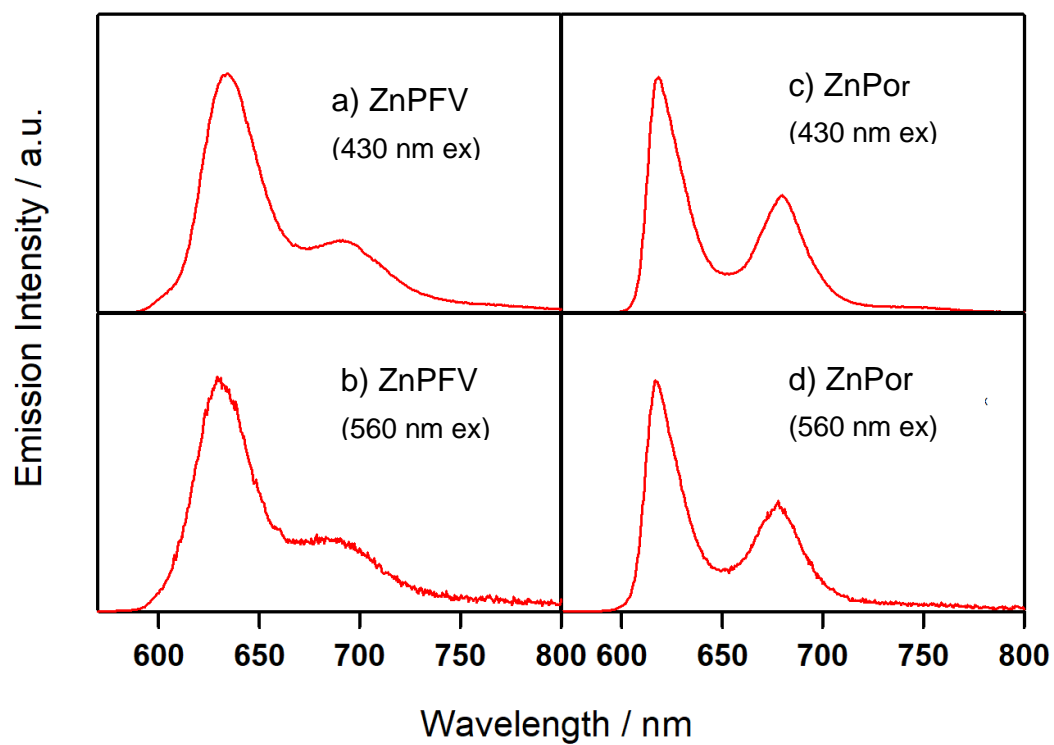

**Figure S3.** Steady state emission spectra in 2mTHF at 77K of a) ZnPFV excited at 430 nm, b) ZnPFV excited at 560 nm, c) ZnPor excited at 430 nm and d) ZnPor excited at 560nm.

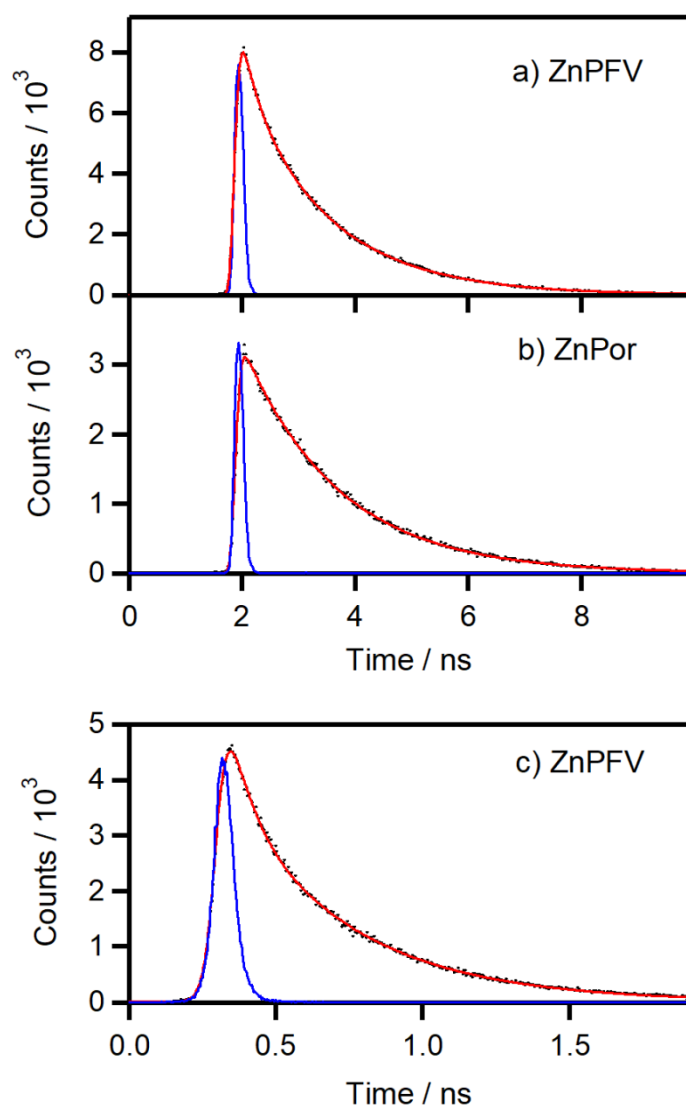

**Figure S4.** Time-resolved fluorescence signals of a) ZnPFV monitored at 660 nm, b) ZnPor monitored at 660 nm and c) ZnPFV monitored at 500 nm in THF, together with the instrumental responses. Excitation was done at 406 nm (FWHM = 70 ps). Dots are observed signals and fits are in solid line. For the fitting functions and obtained parameters were given in the foot note of Table S1.

**Table S1.** Fluorescence decay parameters<sup>a)</sup> of ZnPFV and ZnPor in THF

| Sample | Time scale | Band                  | $\tau_1$ / ns | $A_1$ | $\tau_2$ / ns | $A_2$ | $\chi^2$ | Wavelength at the band maximum |
|--------|------------|-----------------------|---------------|-------|---------------|-------|----------|--------------------------------|
| ZnPFV  | 2 ns       | PFV-I <sup>b)</sup>   | 0.060         | 0.048 | 0.410         | 0.060 | 1.15     | 462 nm                         |
|        |            | PFV-II <sup>b)</sup>  | 0.060         | 0.047 | 0.410         | 0.060 | 1.09     | 494 nm                         |
|        |            | PFV-III <sup>b)</sup> | 0.060         | 0.025 | 0.400         | 0.034 | 1.24     | 532 nm                         |
|        | 10 ns      | PFV-Por <sup>b)</sup> | 1.52          | 0.32  | 0.400         | 0.096 | 1.12     | 640 nm                         |
| ZnPor  | 10 ns      | Por-I <sup>c)</sup>   | 1.68          | 0.15  | -             | -     | 1.11     | 624 nm                         |
|        | 10 ns      | Por-II <sup>c)</sup>  | 1.68          | 0.12  | -             | -     | 1.10     | 673 nm                         |

<sup>a)</sup> Fitting procedure was carried out by using a convoluted function of this decay function with an instrumental response, i.e., the excitation pulse profile.

<sup>b)</sup> A double exponential function,  $y = A_1 \exp(-t / \tau_1) + A_2 \exp(-t / \tau_2)$ , was used.

<sup>c)</sup> A single exponential decay function,  $y = A_1 \exp(-t / \tau_1)$  was used.

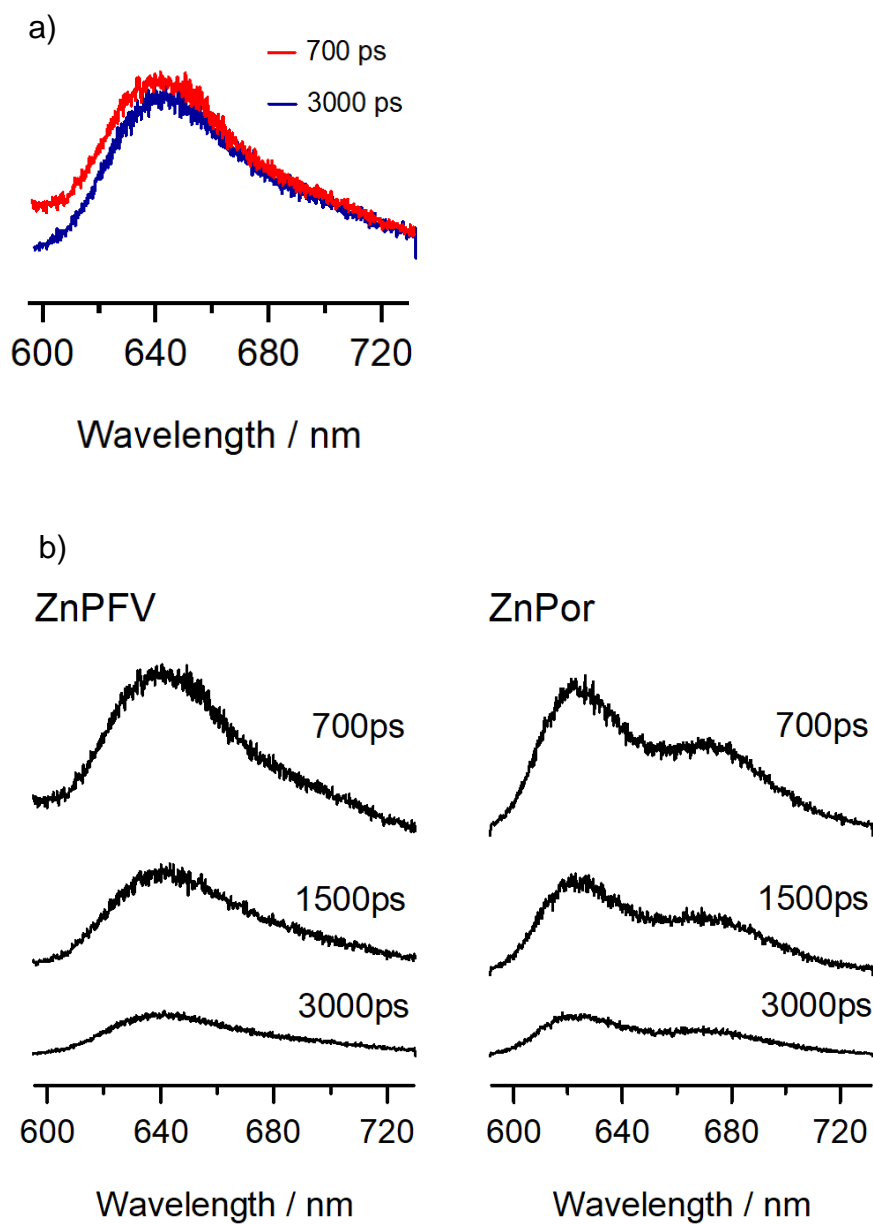

**Figure S5.** a) Comparison of time-resolved fluorescence spectra of ZnPFV taken at the delay times of 700 ps and 3000 ps in THF. In the 700 ps spectrum, broad background signal was overlapped. b) Comparison of time-resolved fluorescence spectra of ZnPFV (left) and the reference ZnPor (right). In the reference ZnPor, there was no back ground signal.
